# Supplementary material for: Impact of preoperative continuous supra-inguinal fascia iliaca block or anterior quadratus lumborum block versus conventional analgesia on quality of recovery after hip fracture surgery: A three-arm randomized clinical trial
Source: Research Square preprint supplement (doi:10.21203/rs.3.rs-8504943/v1), 2026-01-20
Supplement: Supplementary file 1 [file 5ddc311dc0c691f9e92469e7.docx]

**Table S1.** Intraoperative Data

|  | **Control (n=53)** | **Supra-inguinal FIB (n=53)** | **Anterior QLB (n=53)** | ***P* value** |
| --- | --- | --- | --- | --- |
| Type of anesthesia |  |  |  | 0.833 |
| General anesthesia | 20 (37.7) | 23 (43.4) | 21 (39.6) |
| Combined spinal-epidural anesthesia | 33 (62.3) | 30 (56.6) | 32 (60.4) |
| Anesthesia duration (min) | 170 (148, 205) | 178 (157, 219) | 181 (161, 216) | 0.417 |
| General anesthesia | (n=20) | (n=23) | (n=21) |  |
| N2O | 1 (5.0) | 3 (13.0) | 3 (14.3) | 0.686 |
| Sevoflurane | 16 (80.0) | 17 (73.9) | 13 (61.9) | 0.420 |
| Use of midazolam | 1 (5.0) | 3 (13.0) | 4 (19.0) | 0.460 |
| Midazolam (mg) | 0 (0, 0) | 0 (0, 0) | 0 (0, 0) | 0.383 |
| Propofol (mg) | 449 (303, 550) | 367 (288, 585) | 500 (350, 625) | 0.488 |
| Etomidate (mg) | 10 (8, 16) | 8 (0, 11) | 10 (0, 12) | 0.195 |
| Sufentanil (μg) | 25 (20, 31) | 25 (15, 30) | 15 (15, 20) | **0.011** |
| Remifentanil (μg) | 514 (365, 925) | 378 (270, 567) | 436 (326, 780) | 0.265 |
| Use of dexmedetomidine | 7 (35.0) | 5 (21.7) | 1 (4.8) | 0.051 |
| Dexmedetomidine (μg) | 0 (0, 21) | 0 (0, 0) | 0 (0, 0) | **0.042** |
| Rocuronium (mg) | 53 (48, 66) | 50 (40, 50) | 50 (30, 60) | 0.205 |
| Combined spinal-epidural anesthesia | (n=33) | (n=30) | (n=32) |  |
| Time to complete (min) | 15 (10, 15) | 13 (10, 15) | 10 (10, 15) | 0.103 |
| Type of surgery |  |  |  | 0.650 |
| Proximal femoral nail anti-rotation | 22 (41.5) | 22 (41.5) | 20 (37.7) |
| Half Hip arthroplasty | 29 (54.7) | 25 (47.2) | 29 (54.7) |
| Total Hip arthroplasty | 2 (3.8) | 6 (11.3) | 4 (7.5) |
| Surgical approach |  |  |  | 0.472 |
| Anterior | 6 (11.3) | 4 (7.5) | 8 (15.1) |
| Posterior-lateral | 47 (88.7) | 49 (92.5) | 45 (84.9) |
| Surgical duration (min) | 90 (72, 112) | 100 (86, 114) | 93 (77, 129) | 0.236 |
| Arterial blood gas | n=35 | n=40 | n=31 |  |
| Lowest hemoglobin (g/L) | 112 (91, 126) | 109 (90, 124) | 98 (91, 105) | 0.213 |
| Highest glucose (mmol/L) | 6.9 (5.8, 9.0) | 7.3 (5.7, 8.3) | 7.3 (6.3, 8.8) | 0.634 |
| Highest lactate (mmol/L) | 1.1 (0.9, 1.4) | 0.9 (0.8, 1.1) # | 0.9 (0.7, 1.3) | **0.035** |
| Fluid balance |  |  |  |  |
| Fluid infusion (ml) | 1300 (1100, 1800) | 1300 (1100, 1800) | 1600 (1200, 1800) | 0.288 |
| Estimated bleeding (ml) | 100 (100, 200) | 200 (100, 300) | 150 (100, 300) | 0.307 |
| Urine (ml) | 200 (100, 300) | 200 (100, 400) | 250 (120, 400) | 0.150 |
| Blood product transfusion | 15 (28.3) | 21 (39.6) | 17 (32.1) | 0.453 |
| Packed red cells (ml) | 0 (0, 243) | 0 (0, 400) | 0 (0, 400) | 0.524 |
| Frozen fresh plasma (ml) | 0 (0, 0) | 0 (0, 0) | 0 (0, 100) | 0.668 |

Values are presented as median (Q1, Q3) or number (%). P values in bold indicate <0.05. # *P*<0.0167 versus the control group after Bonferroni correction.

FIB, fascia iliaca block; QLB, quadratus lumborum block; ICU, intensive care unit.

**Table S2.** Individual Complications in Hospital after Surgery.

|  | **Control (n=53)** | **Supra-inguinal FIB (n=53)** | **Anterior QLB (n=53)** | ***P* value** |
| --- | --- | --- | --- | --- |
| Atelectasis a | 1 (1.9) | 0 (0.0) | 0 (0.0) | >0.999 |
| Pneumonia b | 3 (5.7) | 0 (0.0) | 0 (0.0) | 0.107 |
| Respiratory failure c | 1 (1.9) | 0 (0.0) | 0 (0.0) | >0.999 |
| Pulmonary embolism d | 0 (0.0) | 2 (3.8) | 0 (0.0) | 0.329 |
| Gastrointestinal hemorrhage e | 0 (0.0) | 1 (1.9) | 0 (0.0) | >0.999 |
| Acute kidney injury f | 3 (5.7) | 5 (9.4) | 3 (5.7) | 0.791 |
| Stroke g | 0 (0.0) | 1 (1.9) | 0 (0.0) | >0.999 |
| Delirium h | 6 (11.3) | 5 (9.4) | 5 (9.4) | 0.933 |
| Arrhythmia i | 1 (1.9) | 2 (3.8) | 1 (1.9) | >0.999 |
| Myocardial injury j | 8 (15.1) | 7 (13.2) | 8 (15.1) | 0.950 |
| Acute myocardial infarction k | 1 (1.9) | 2 (3.8) | 0 (0.0) | 0.774 |
| Wound infection l | 0 (0.0) | 1 (1.9) | 0 (0.0) | >0.999 |
| Deep vein thrombosis m | 2 (3.8) | 0 (0.0) | 0 (0.0) | 0.329 |

Values are presented as number (%). FIB, fascia iliaca block; QLB, quadratus lumborum block.

a Radiography showed lung opacification with a shift of the mediastinum, hilum, or hemidiaphragm toward the affected area, and compensatory overinflation in the adjacent non-atelectatic lung.

b New infiltrate on chest radiograph with hyperthermia (>38.3°C) and leukocytosis and required intravenous antibiotic therapy.

c PaO2 < 60 mmHg, companied with respiratory distress and needing ventilation assistance.

d Diagnosed with computed tomography pulmonary angiogram, which showed filling defects in the pulmonary artery and its branches.

e Hematemesis or blood stool or stool occult blood positive.

f Diagnosed with KDIGO (Kidney Disease: Improving Global Outcomes) criteria, i.e., a rise of serum creatinine >26.5 μmol/L within 48 hours.

g Focal cerebral deficit lasting for more than 24 hours and confirmed by neurologic imaging.

h Diagnosed with CAM or CAM-ICU method.

i Newly onset arrhythmia diagnosed with 12-lead electrocardiogram.

j High-sensitivity cardiac troponin I exceeded the 99% upper reference level, i.e., >11.6 ng/ml in female and >19.8 ng/ml in male.

k Myocardial injury concurrent with clinical symptoms of myocardial ischemia.

l Delayed wound healing and required antibiotics, drainage and debridement treatment.

m Confirmed by lower limb venous ultrasonography.

**Table S3.** Details of NRS Pain Scores at Preset Timepoints.

|  | **Control** **(n=53)** | **Supra-inguinal FIB (n=53)** | **Anterior QLB (n=53)** | ***P* value a** | **Supra-inguinal FIB vs. control** | | **Anterior QLB vs. control** | | **Anterior QLB vs. Supra-inguinal FIB** | |
| --- | --- | --- | --- | --- | --- | --- | --- | --- | --- | --- |
| **MD (95% CI)** | **P value b** | **MD (95% CI)** | **P value b** | **MD (95% CI)** | ***P* value** |
| At rest |  |  |  |  |  |  |  |  |  |  |
| 1 h post-enrollment | 2 (1, 3) | 1 (0, 2) | 0 (0, 1) | **<0.001** | -1 (-2, 0) | **<0.001** | -1 (-2, -1) | **<0.001** | 0 (-1, 0) | 0.079 |
| 1 d post-enrollment | 1 (1, 3) | 1 (0, 2) | 0 (0, 1) | **<0.001** | -1 (-1, 0) | **0.003** | -1 (-1, -1) | **<0.001** | 0 (0, 0) | 0.116 |
| 6 h post-surgery | 0 (0, 2) | 0 (0, 1) | 0 (0, 0) | 0.173 | 0 (0, 0) | 0.777 | 0 (0, 0) | 0.080 | 0 (0, 0) | 0.130 |
| 24 h post-surgery | 1 (0, 2) | 0 (0, 1) | 0 (0, 1) | **0.018** | 0 (-1, 0) | 0.093 | 0 (-1, 0) | **0.006** | 0 (0, 0) | 0.261 |
| 48 h post-surgery | 1 (0, 2) | 0 (0, 1) | 0 (0, 0) | **0.002** | 0 (-1, 0) | 0.031 | 0 (-1, 0) | **<0.001** | 0 (0, 0) | 0.189 |
| 72 h post-surgery | 1 (0, 1) | 0 (0, 1) | 0 (0, 0) | **<0.001** | 0 (-1, 0) | **0.016** | 0 (-1, 0) | **<0.001** | 0 (0, 0) | 0.103 |
| With movement |  |  |  |  |  |  |  |  |  |  |
| 1 h post-enrollment | 6 (5, 8) | 4 (3, 5) | 3 (3, 4) | **<0.001** | -2 (-3, -2) | **<0.001** | -3 (-4, -2) | **<0.001** | -1 (-1, 0) | 0.042 |
| 1 d post-enrollment | 6 (5, 7) | 4 (3, 5) | 4 (3, 5) | **<0.001** | -2 (-3, -1) | **<0.001** | -2 (-3, -2) | **<0.001** | 0 (-1, 0) | 0.315 |
| Lateral position c | 6 (5, 8) (n=33) | 4 (3, 5) (n=30) | 4 (3, 5) (n=32) | **<0.001** | -2 (-3, -1) | **<0.001** | -2 (-3, -1) | **<0.001** | 0 (-1, 1) | 0.662 |
| 6 h post-surgery | 3 (0, 4) | 2 (0, 4) | 2 (0, 3) | **0.032** | 0 (-1, 0) | 0.448 | -1 (-2, 0) | **0.011** | 0 (-1, 0) | 0.069 |
| 24 h post-surgery | 4 (3, 5) | 3 (2, 5) | 3 (2, 4) | **0.005** | -1 (-1, 0) | 0.030 | -1 (-2, 0) | **<0.001** | 0 (-1, 0) | 0.242 |
| 48 h post-surgery | 4 (3, 5) | 3 (2, 4) | 3 (2, 3) | **0.001** | -1 (-1, 0) | 0.049 | -1 (-2, 0) | **<0.001** | 0 (-1, 0) | 0.086 |
| 72 h post-surgery | 3 (2, 5) | 3 (2, 4) | 2 (2, 3) | **<0.001** | -1 (-1, 0) | 0.106 | -1 (-2, 0) | **<0.001** | -1 (-1, 0) | 0.016 |

Data are median (Q1,Q3) unless otherwise indicated.

NRS, numeric rating scale; FIB, fascia iliaca block; QLB, quadratus lumborum block; MD, median difference; CI, confidence interval.

a P values in bold indicate <0.05.

b P values in bold indicate <0.0167 and is considered statistically significant after Bonferroni correction.

c For neuraxial anesthesia.

**Table** **S4.** Perioperative Adverse Events.

|  | **Control (n=53)** | **Supra-inguinal FIB (n=53)** | **Anterior QLB (n=53)** | ***P* value** |
| --- | --- | --- | --- | --- |
| Block related |  |  |  |  |
| Block failure | NA | 0 (0.0) | 1 (1.9) | >0.999 |
| Catheter dislocation | NA | 7 (13.2) | 2 (3.8) | 0.161 |
| Day of surgery |  |  |  |  |
| Arrhythmia a | 1 (1.9) | 1 (1.9) | 1 (1.9) | >0.999 |
| Hypotension b | 26 (49.1) | 31 (58.5) | 28 (52.8) | 0.619 |
| Hypertension c | 8 (15.1) | 5 (9.4) | 5 (9.4) | 0.569 |
| Bradycardia d | 3 (5.7) | 0 (0) | 0 (0) | 0.107 |
| Tachycardia e | 2 (3.8) | 4 (7.5) | 3 (5.7) | 0.910 |
| After surgery |  |  |  |  |
| PONV within 72 h | 7 (13.2) | 4 (7.5) | 7 (13.2) | 0.569 |

Values are presented as number (%). FIB, fascia iliaca block; QLB, quadratus lumborum block; PONV, postoperative nausea and vomiting; NA: not applicable.

a Included newly onset atrial bigeminy, frequent premature atrial contraction, and supraventricular tachycardia.

b Defined as systolic blood pressure < 90 mmHg or decreased for > 30% from baseline (value in the ward on the day of surgery).

c Defined as systolic blood pressure > 180 mmHg or increased for > 30% from baseline (value in the ward on the day of surgery).

d Defined as heart rate < 45 beat per minute.

e Defined as heart rate > 100 beat per minute.
